# Supplementary material for: Quantification of linezolid in serum by LC-MS/MS using semi-automated sample preparation and isotope dilution internal standardization
Source: publisher site journal article supplement (doi:10.1515/cclm-2013-0594), 2013-10-25
Supplement: Supplementary file 1 [file CCLM.2013.0594.R1_Revised_version_Supplemental_Data_Figure_captions.docx]

Supplemental Data Figure 1:

Molecular structure of the internal standard d3-linezolid. Figure from Toronto Research Chemicals.

Supplemental Data Figure 2:

Scheme of the automated on-line solid phase configuration at the two different positions. AC, analytical column; W, waste; MS, mass spectrometry
