# Supplementary material for: Quantification of linezolid in serum by LC-MS/MS using semi-automated sample preparation and isotope dilution internal standardization
Source: publisher site journal article supplement (doi:10.1515/cclm-2013-0594), 2013-10-25
Supplement: Supplementary file 2 [file CCLM.2013.0594.R1_Revised_version_Supplemental_Data_Table_2.docx]

Supplemental Data Table 2: Stability of sample extracts (autosampler stability) of quality control samples

|  | Recovery [%]1 at a storage temperature of | | | |
| --- | --- | --- | --- | --- |
|  | room temperature | | 4°C | |
|  | 1 day | 1 week | 1 day | 1 week |
| QC A (0.5 mg/L) | 96.1 ± 2.7 | 101.4 ± 1.2 | 96.4 ± 0.6 | 102.7 ± 4.7 |
| QC B (4.0 mg/L) | 96.5 ± 4.8 | 101.6 ± 1.2 | 96.8 ± 2.9 | 106.3 ± 4.3 |
| QC C (16.0 mg/L) | 96.8 ± 2.6 | 98.9 ± 4.3 | 97.5 ± 4.7 | 103.8 ± 6.1 |
| Control A (0.38 mg/L) | 100.9 ± 1.6 | 99.7 ± 5.5 | 102.1 ± 5.3 | 106.8 ± 4.6 |
| Control B (6.0 mg/L) | 99.2 ± 1.4 | 102.6 ± 1.7 | 98.7 ± 1.1 | 104.5 ± 1.0 |
| Serum pool (8.6 mg/L) | 97.2 ± 3.0 | 99.8 ± 0.5 | 98.2 ± 1.2 | 99.1 ± 4.2 |

1 Each value represents the recovery based on means of three different measurements
