# Supplementary material for: Quantification of linezolid in serum by LC-MS/MS using semi-automated sample preparation and isotope dilution internal standardization
Source: publisher site journal article supplement (doi:10.1515/cclm-2013-0594), 2013-10-25
Supplement: Supplementary file 3 [file CCLM.2013.0594.R1_Revised_version_Supplemental_Data_Table_3.docx]

Supplemental Data Table 3: Stability of samples after three freeze thaw cycles

| **Sample** | **Recovery [%]1 ± standard deviation after three freeze thaw cycles** |
| --- | --- |
| QC A (0.5 mg/L) | 102.1 ± 6.2 |
| QC C (16.0 mg/L) | 96.5 ± 1.1 |
| Serum pool (~8.6 mg/L) | 100.5 ± 8.3 |

1 Each value represents the recovery based on means of three measurements
